# Supplementary material for: Investigation of the kinetics and mechanism of Z-scheme Ag3PO4/WO3 p–n junction photocatalysts with enhanced removal efficiency for RhB
Source: Royal Society of Chemistry journal article supplement (doi:10.1039/c9nj04369a), 2019-01-01
Supplement: c9nj04369a1.pdf [file c9nj04369a1.pdf]

## Supporting Information

### Investigation on kinetic and mechanism of Z-scheme $\text{Ag}_3\text{PO}_4/\text{WO}_3$ p-n junction photocatalyst with enhanced removal efficiency of RhB

Lisha You,<sup>†a</sup> Minghuan Gao,<sup>†a</sup> Tiesheng Li,<sup>a\*</sup> Linna Guo,<sup>a</sup> Penglei Chen,<sup>ab</sup> and Minghua Liu<sup>b</sup>

<sup>a</sup>*College of Chemistry and Molecular Engineering, Zhengzhou University, The Key Lab of Chemical Biology and Organic Chemistry of Henan Province, The Key Lab of Nano-information Materials of Zhengzhou, Zhengzhou, 450001, People's Republic of China.*

<sup>b</sup>*Beijing National Laboratory for Molecular Science, Institute of Chemistry, Chinese Academy of Sciences, No. 2 Zhongguancun Beiyijie, Beijing 100190, People's Republic of China.*

<sup>†</sup>.These authors contributed equally.

\*Corresponding author.

E-mail address: Tiesheng Li, [lts34@zzu.edu.cn](mailto:lts34@zzu.edu.cn)

Tel.: +86-371-67766660 (Office)

Fax.: +86-371-67766667 (Office)

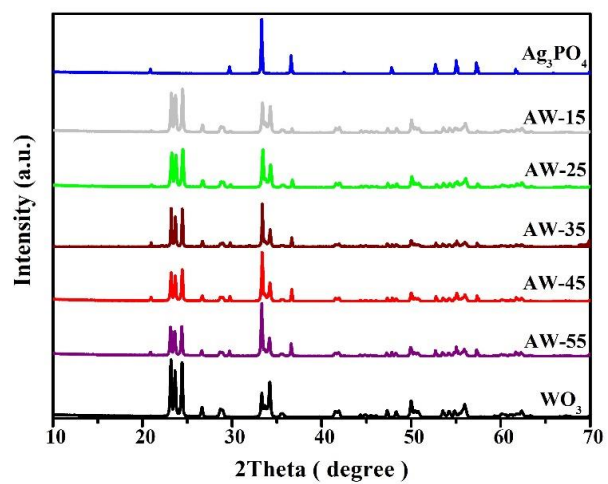

**Figure S1.** XRD patterns of as-prepared WO<sub>3</sub>, Ag<sub>3</sub>PO<sub>4</sub>, AW-15, AW-25, AW-35, AW-45 and AW-55.

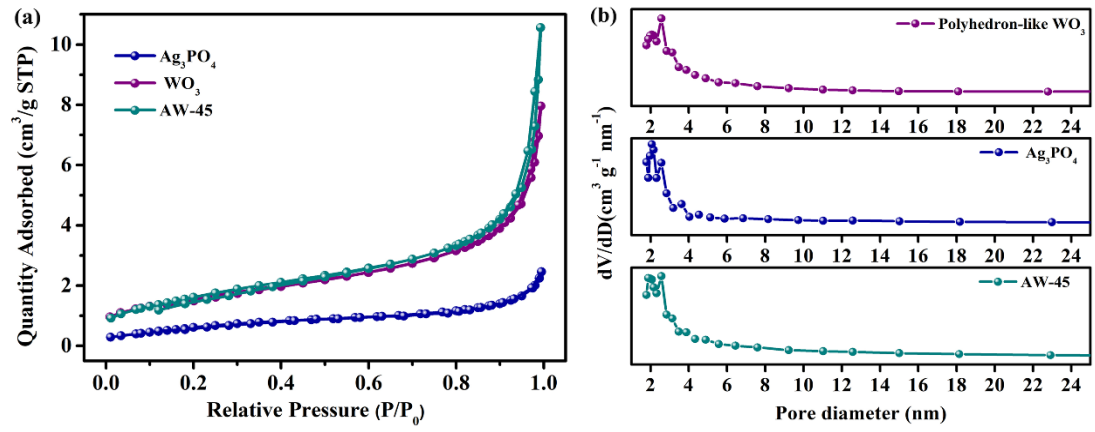

**Figure S2.** (a) N<sub>2</sub> adsorption-desorption isotherm of Ag<sub>3</sub>PO<sub>4</sub>, WO<sub>3</sub>, AW-45 at 77K, (b) the pore size distribution of the prepared samples, respectively.

**Table. S1.** BET surface areas, pore diameter and pore volumes of the as-prepared samples.

| Photocatalysts           | $S_{\text{BET}}(\text{m}^2\text{g}^{-1})$ | Pore diameter (nm) | Pore volume ( $\text{cm}^3 \text{g}^{-1}$ ) |
|--------------------------|-------------------------------------------|--------------------|---------------------------------------------|
| $\text{WO}_3$            | 2.4734                                    | 22.2494            | 0.0137                                      |
| $\text{Ag}_3\text{PO}_4$ | 2.4543                                    | 5.3808             | 0.0038                                      |
| AW-15                    | 1.0342                                    | 23.645             | 0.0061                                      |
| AW-25                    | 1.9529                                    | 15.8934            | 0.0077                                      |
| AW-35                    | 1.7432                                    | 15.7520            | 0.0055                                      |
| AW-45                    | 1.9458                                    | 19.6769            | 0.0093                                      |
| AW-55                    | 2.0271                                    | 21.1797            | 0.0107                                      |

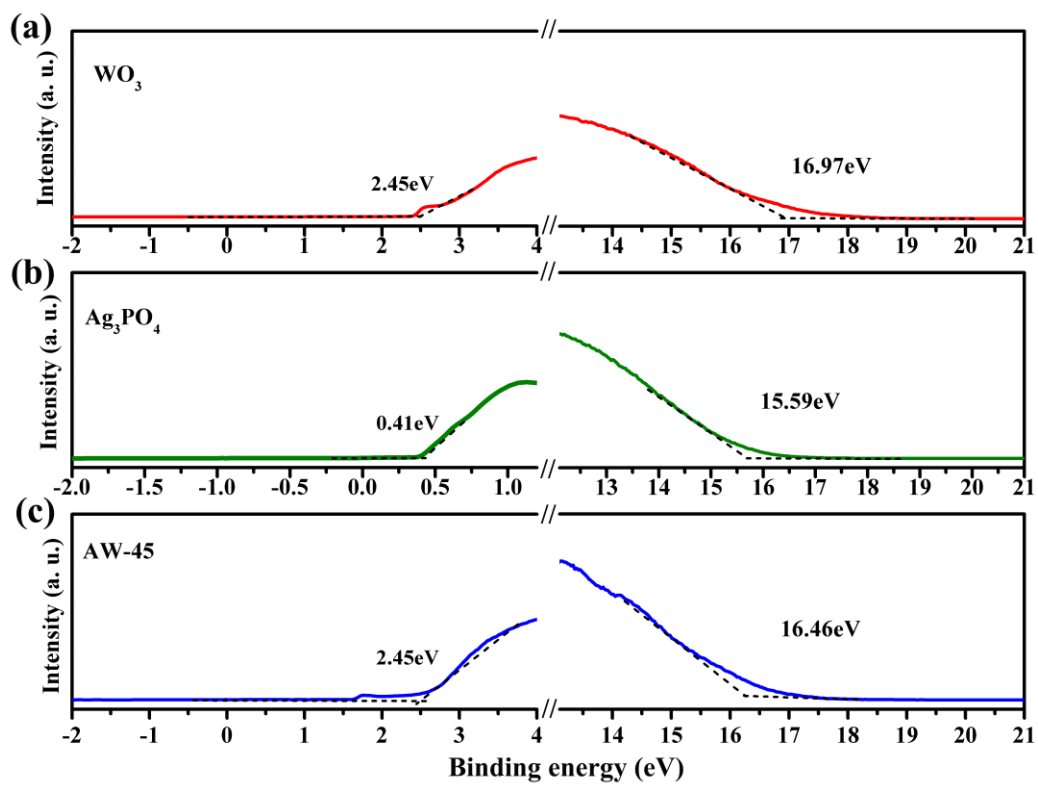

Figure S3. Ultraviolet photoelectron spectrum as well as linear intersection for (a)  $\text{WO}_3$ , (b)  $\text{Ag}_3\text{PO}_4$ , and (c) AW-45.

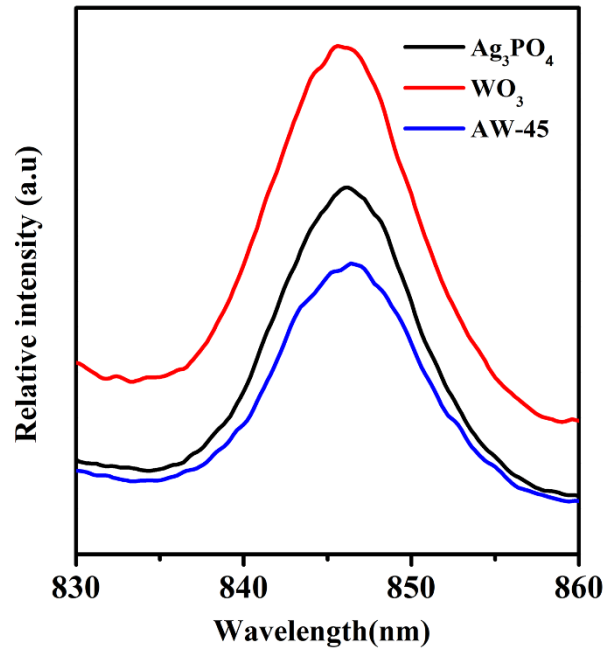

**Figure S4.** PL spectra of  $\text{Ag}_3\text{PO}_4$ ,  $\text{WO}_3$ , and AW-45.

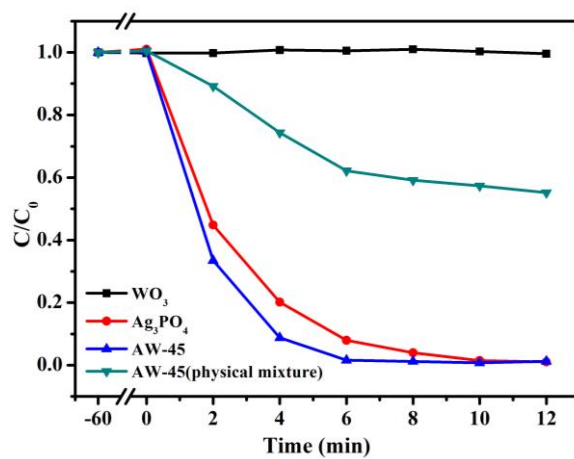

**Figure S5.** The photocatalytic activity of spherical  $Ag_3PO_4$ ,  $WO_3$ , AW-45 and AW-45 (physical mixture) samples on RhB (30 ppm) degradation under visible-light irradiation.

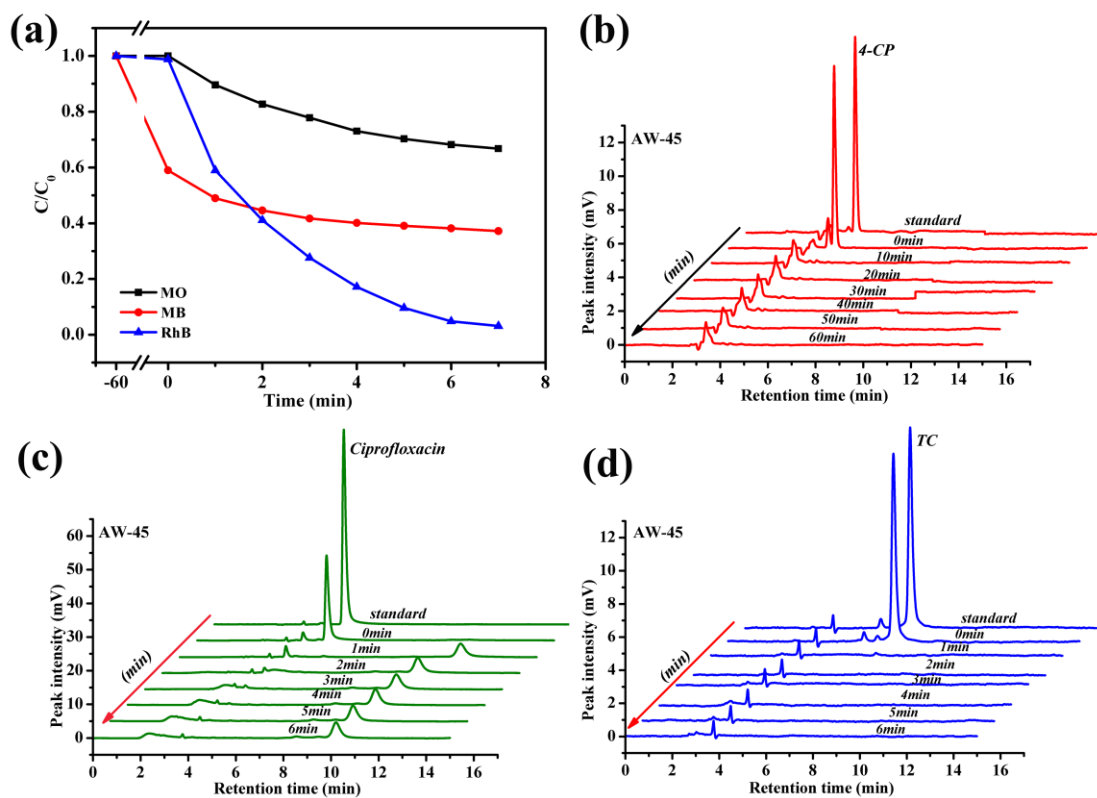

**Figure S6.** (a) The photocatalytic activities of AW-45 sample for the degradation of, MO, MB and RhB (30 ppm) (b, c, d) The comparison of HPLC degradation profiles of 4-CP(4-chlorophenol), Ciprofloxacin and TC (tetracycline) in visible-light irradiation.



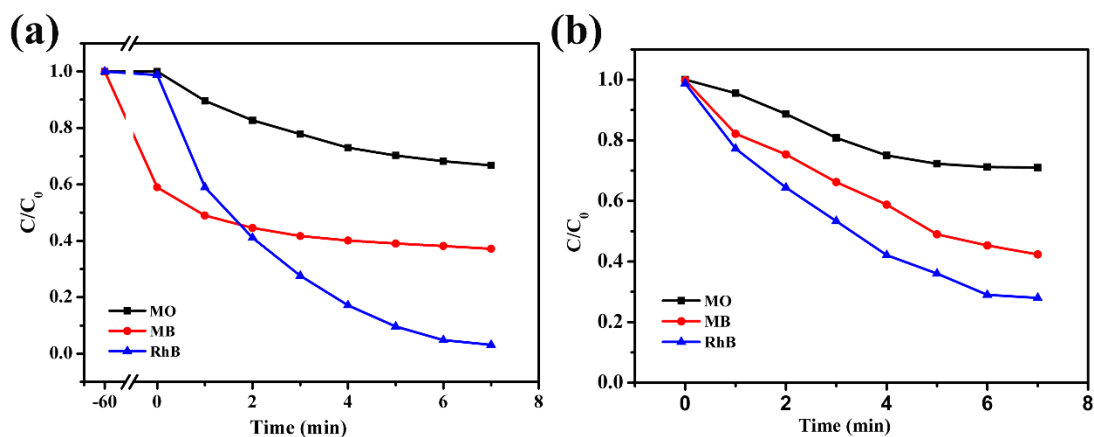

**Fig. S7** (a) Adsorption and photocatalytic activity of AW-45 for MO, MB and RhB (30 ppm). (b) The photocatalytic activities of AW-45 for 30 ppm RhB degradation under visible-light irradiation;

Fig. S7 shows that after 60 min of magnetic stirring in darkness, the AW-45 can adsorb MO (2.8%), MB (42%) and RhB (3.6%), respectively. Under visible-light irradiation, MO, MB and RhB were degraded approximately 44%, 63% and 99% after 7 min irradiation, respectively. However, Fig. S7b shows that both MO, MB and RhB were degraded approximately 30%, 55% and 70% after 7 min irradiation, respectively, without adsorption-desorption equilibrium experiments, the catalytic activity in Fig. S7b is lower Fig. S7a. The reason for the above results may be that there is no insufficient contact between the substrate and the catalysts without adsorption-desorption equilibrium experiments.

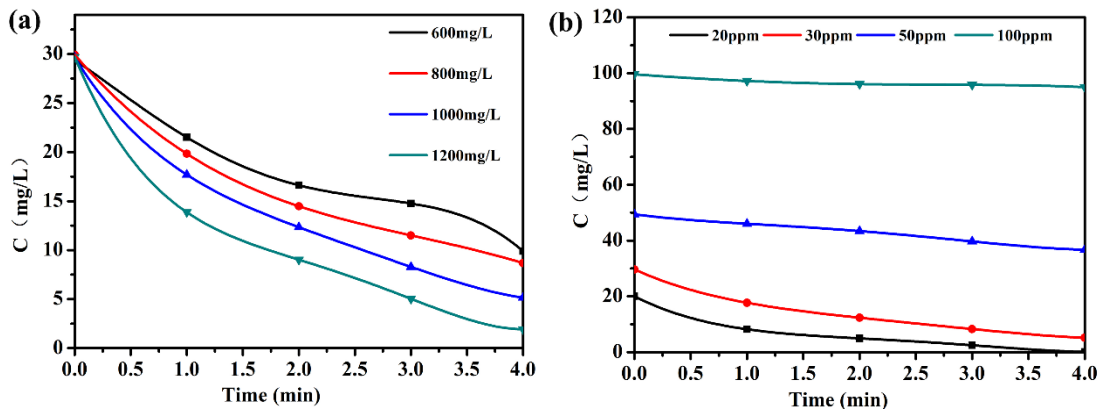

**Figure S8.** (a) RhB concentration curves at different times with the same initial catalyst concentration of and different RhB concentration. (b) RhB degradation concentration curve at different time with the same initial concentration of RhB and different catalyst concentration.

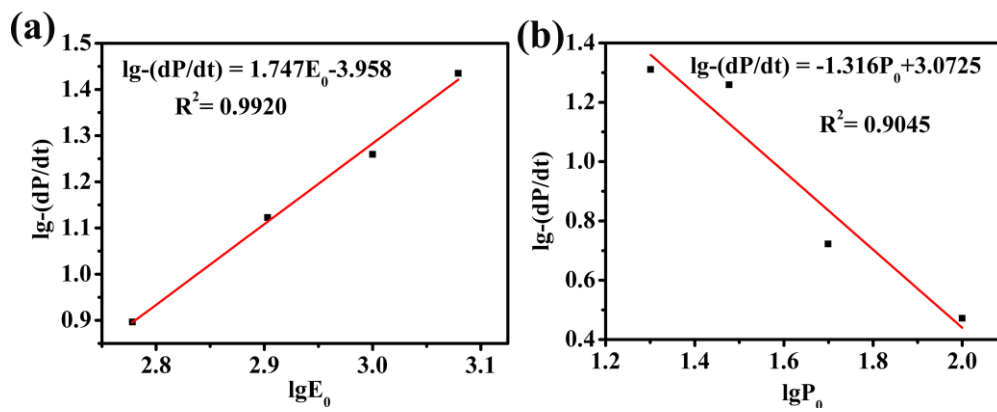

**Figure. S9** (a) Plots of  $\lg(-dP/dt)$  versus  $\lg E_0$ . (b) Plots of  $\lg(-dP/dt)$  versus  $\lg P_0$ .

**Table. S2.** The corresponding equations are obtained by fitting the four curves in the figure S1a respectively with the method of arbitrary approximation of higher-order polynomials, from top to bottom:

| Concentration | Equation                                                   |
|---------------|------------------------------------------------------------|
| 600mg/L       | $P_1 = -0.252t^4 + 1.518t^3 - 1.286t^2 - 7.877t + 29.412$  |
| 800mg/L       | $P_2 = 0.005t^4 - 0.421t^3 + 3.593t^2 - 13.264t + 29.927$  |
| 1000mg/L      | $P_3 = 0.201t^4 - 2.081t^3 + 8.118t^2 - 18.173t + 29.634$  |
| 1200mg/L      | $P_4 = 0.422t^4 - 4.218t^3 + 15.192t^2 - 27.226t + 29.698$ |

The derivative of the above equations at time t is as follows:

$$\left(\frac{dP_1}{dt}\right)\Big|_{t=0} = -7.877$$

$$\left(\frac{dP_2}{dt}\right)\Big|_{t=0} = -13.264$$

$$\left(\frac{dP_3}{dt}\right)\Big|_{t=0} = -18.173$$

$$\left(\frac{dP_4}{dt}\right)\Big|_{t=0} = -27.226$$

**Table. S3** The initial reaction rates corresponding to different initial concentrations of RhB.

| The initial concentration of catalyst: $E_0$ | 600mg/L | 800mg/L | 1000mg/L | 1200mg/L |
|----------------------------------------------|---------|---------|----------|----------|
| $LgE_0$                                      | 2.778   | 2.903   | 3        | 3.079    |
| $-\left(\frac{dP}{dt}\right)$                | 7.877   | 13.264  | 18.173   | 27.226   |
| $lg - \left(\frac{dP}{dt}\right)$            | 0.896   | 1.123   | 1.259    | 1.435    |

The common logarithm is taken to obtain a set of related data of  $lg-(dP/dt)$  and  $E_0$ , so we can get a linear correlation graph **Figure S9.a**

**Table. S4.** The corresponding equations are obtained by fitting the four curves in the figure S1b respectively with the method of arbitrary approximation of higher-order polynomials, from bottom to top:

| Concentration | Equation                                        |
|---------------|-------------------------------------------------|
| 20ppm         | $P_1=0.297t^4-3.079t^3+11.437t^2-20.464t+20.00$ |
| 30ppm         | $P_2=0.211t^4-2.081t^3+8.118t^2-18.172t+29.643$ |
| 50ppm         | $P_3=0.151t^4-1.221t^3+2.592t^2-2.276t+49.409$  |
| 100ppm        | $P_4=-0.037t^4+0.146t^3+0.463t^2-2.963t+99.599$ |

The derivative of the above equations at time t is as follows:

$$\left(\frac{dP_1}{dt}\right)\Big|_{t=0} = -20.464$$

$$\left(\frac{dP_2}{dt}\right)\Big|_{t=0} = -18.172$$

$$\left(\frac{dP_3}{dt}\right)\Big|_{t=0} = -5.276$$

$$\left(\frac{dP_4}{dt}\right)\Big|_{t=0} = -2.963$$

**Table. S5** The initial reaction rates corresponding to different initial concentrations of RhB.

| The initial concentration of RhB:P <sub>0</sub> | 20ppm  | 30ppm  | 50ppm | 100ppm |
|-------------------------------------------------|--------|--------|-------|--------|
| lgP <sub>0</sub>                                | 1.301  | 1.477  | 1.699 | 2      |
| $-\left(\frac{dP}{dt}\right)$                   | 20.464 | 18.172 | 5.276 | 2.963  |
| $lg - \left(\frac{dP}{dt}\right)$               | 1.311  | 1.259  | 0.722 | 0.472  |

The common logarithm is taken to obtain a set of related data of lg-(dP/dt) and E<sub>0</sub>, so we can get a linear correlation graph **Figure S9.b**

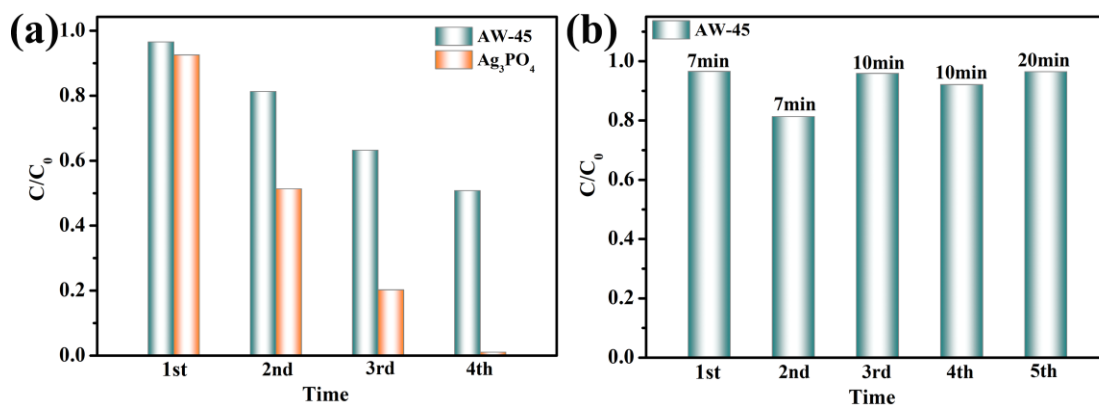

**Figure. S10.** (a) Cycling runs in photocatalytic degradation of RhB in the presence of AW-45 and  $Ag_3PO_4$ ; (b) Cycling runs of the AW-45 sample for RhB degradation under different visible-light irradiation time;

Photo-corrosion is a common problem in silver phosphate materials. However, considering the practical application problem, the cycle experiment was re-ran and the exposure time was extended. It can be found that although the circulation capacity of **AW-45** is not ideal, it has slowed down the photo-corrosion of the catalyst to some extent compared to pure silver-based catalysts (Figure. S10a). When the irradiation time was extended to 10 minutes in the third and fourth cycles, it can be seen that the RhB could be degraded about 95% (Figure.S10b). After the sixth extension to 20 minutes, it can still exhibit superior degradation properties (Figure.S10b).

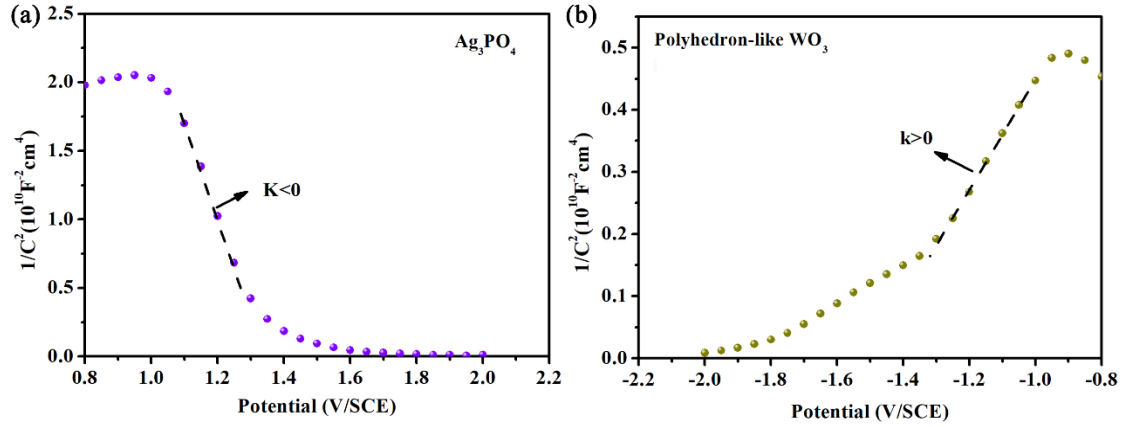

**Fig. S11.** Mott-Schottky cures of (a)  $\text{Ag}_3\text{PO}_4$  and (b)  $\text{WO}_3$

We have mentioned that  $\text{Ag}_3\text{PO}_4$  material is always a p-type semiconductor [53, 54], and  $\text{WO}_3$  material is most likely to be an n-type semiconductor [55, 56] in the chapter of introduction. Therefore, considering the particularity of as-obtained samples, we have also performed Mott-Schottky (M-S) methods to further detect the inherent electronic properties of pristine  $\text{Ag}_3\text{PO}_4$  and  $\text{WO}_3$ . As shown in Fig. S6, the slope of  $1/C^2$  vs potential curves (SCE) over  $\text{Ag}_3\text{PO}_4$  material is negative, and that of  $\text{WO}_3$  sample is positive. As is known to all, in Mott-Schottky test, the positive and negative slope represents p-type and n-type semiconductors, respectively [51]. Herein, by analyzing the results above, we have gained the ample evidences to verify that  $\text{Ag}_3\text{PO}_4$  material is a p-type semiconductor,  $\text{WO}_3$  is an n-type semiconductor, while the two type semiconductors combined with each other, there will be a p-n junction between the surfaces of two type semiconductors.



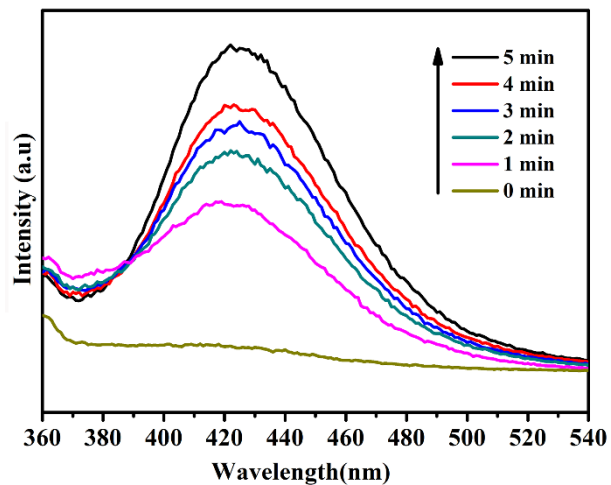

**Figure. S12.**  $\bullet$ OH trapping FL spectral changes over AW-45 sample in a basic terephthalic acid solution (excitation wavelength is 315 nm) with different irradiation time.

**Table. S6.** Comparison of WO<sub>3</sub>/ Ag<sub>3</sub>PO<sub>4</sub> p-n junction photocatalyst degradation towards organic pollutants (RhB) under visible light. C<sub>catalyst</sub> is the concentration of photocatalyst in solution, while C<sub>pollutants</sub> is the concentration of photocatalyst in solution.

| Photocatalysts                                                                  | C <sub>catalyst</sub> (mg/mL) | C <sub>pollutants</sub> (ppm) | Reaction Time (mins) | K <sub>app</sub> | Refer     |
|---------------------------------------------------------------------------------|-------------------------------|-------------------------------|----------------------|------------------|-----------|
| WO <sub>3</sub> /Ag <sub>3</sub> PO <sub>4</sub> p-n junction structure         | 1                             | 30                            | 7                    | 0.49439          | This work |
| Ag <sub>3</sub> PO <sub>4</sub> /Ag/WO <sub>3-x</sub> composite                 | 1                             | 10                            | 3                    | Not given        | [66]      |
| Ag <sub>3</sub> PO <sub>4</sub> /Ag                                             | 1                             | 20                            | 40                   | Not given        | [67]      |
| Ag <sub>3</sub> PO <sub>4</sub> /Bi <sub>2</sub> WO <sub>6</sub> nanocomposites | 1                             | 4.79                          | 80                   | 0.0595           | [68]      |
| CdS/WO <sub>3</sub>                                                             | 0.4                           | 5                             | 120                  | Not given        | [69]      |
| 3DOM-WO <sub>3</sub> /Pt coated by mono-or few-layered WS <sub>2</sub>          | 0.5                           | 30                            | 30                   | 0.156            | [70]      |
| Heterojunction AgI/WO <sub>3</sub> Nanocomposite                                | 0.5                           | 10                            | 21(98%)              | Not given        | [71]      |
